# Supplementary material
Source: publisher figshare collection journal article supplement (https://frontiersin.figshare.com/ndownloader/files/24560495)
Supplement: Supplementary file 1 [file 24560495]

**Content and structure of online questionnaire**

Dear Participant,

Thank you for responding to our invitation. We would now like to ask you a few questions about your opinions on environmental issues. Your opinion is critical to understand better how to find solutions to today’s environmental problems. This survey will take approximately 20 minutes to complete. This questioner is for Saudis only and people who are 18 and above only. If you have any questions please email us at [halmahasheer@iau.edu.sa](mailto:halmahasheer@iau.edu.sa)

Your answers will be treated anonymously

**Q1: How old are you now**

|  | Insert exact age |
| --- | --- |
| Age on last birthday |  |
|  |  |

**Q2: What is your gender?**

|  | Gender |
| --- | --- |
| Male | 1 |
| Female | 2 |

**Q3: Highest degree question**

Below High School (5)

High School (4)

Diploma (3)

Bachelor's degree (2)

Higher Education (1)

Other

**Q4: How many courses about the environment have you taken**

1 to 10

10 (for more than 10)

**Q5: Please select in which province do you live now:**

Eastern Province (2)

Western Province (5)

Northern Province (3)

Southern Province (4)

Central Province (1)

**Q6: Do you live near the coast**

I live near the Red Sea (1)

I live near the Arabian Gulf (2)

No (3)

**Q7: Which sea do you think suffers of more coastal marine issues?**

The Red Sea (1)

The Arabian Gulf (2)

**Q8: Which of these statements best describes how often, if ever, you visit the corniche or the sea?**

Once a week (1)

Once a month (2)

Once or twice a year (3)

I don’t visit the corniche or sea (4)

**Q9: How many times would you volunteer for cleaning the corniche or the sea?**

Once a week (1)

Once a month (2)

Once or twice a year (3)

I don’t volunteer (4)

**Q10: When you think about the coastline or the sea, what are the three most important** marine environmental issues **that come to mind in Saudi Arabia?** Please be as specific as possible.

|  | **Environmental Matter**  **Please be as specific as possible – Max 4 words** |
| --- | --- |
| **1** |  |
| **2** |  |
| **3** |  |

**(YOUR VIEWS ABOUT MARINE ISSUES) Q11: Thinking about the causes of** marine environmental issues in Saudi Arabia**, which, if any, of the following best describes your opinion?** Please select only one answer

| **Rotate statements (Keep Don’t know to the end) – Single answer only** | **Please select one answer** |
| --- | --- |
| marine environmental issues is entirely caused by natural processes | 2 |
| marine environmental issues is mainly caused by natural processes | 5 |
| marine environmental issues is partly caused by natural processes | 7 |
| marine environmental issues is mainly caused by human activity | 4 |
| marine environmental issues is entirely caused by human activity | 1 |
| marine environmental issues is partly caused by human activity | 6 |
| There are no such thing as marine environmental issues | 8 |
| I Don’t know | 3 |

**Q12: In your opinion, which of the following do you consider to be the most serious problem currently facing the world as a whole?** Please select only one answer

| **Rotate statements (keep ‘Other Specify’ and ‘None of these’ to the end – Single answer only** | **Please select one answer** |
| --- | --- |
| Climate change | 1 |
| International terrorism | 2 |
| Poverty, lack of food and drinking water | 3 |
| The spread of an infectious disease | 4 |
| The increasing world population | 5 |
| Wars and conflicts | 6 |
| Other (PLEASE SPECIFY) | 7 |
| All of the above | 8 |

**Q13 How informed do you feel about each of the following?** Please select only one response for each statement

|  | 5. Very well informed | 4.Informed | 3. Little Informed | 2. Not informed at all | 1.Don’t know |
| --- | --- | --- | --- | --- | --- |
| Melting sea-ice |  |  |  |  |  |
| Ocean current changes |  |  |  |  |  |
| Pollution at the coast or in the sea from (petrochemical industries, Plastic, sewage and desalination plants) |  |  |  |  |  |
| Sea level rise |  |  |  |  |  |
| Coastal flooding |  |  |  |  |  |
| Changes in the frequency of extreme weather events (e.g. heat waves and dust storms) |  |  |  |  |  |
| Environmental impacts of aquaculture (e.g. shrimp) |  |  |  |  |  |
| Overfishing or fishing during un-allowed seasons |  |  |  |  |  |
| Oceans becoming more acidic |  |  |  |  |  |
| Sea temperature changes |  |  |  |  |  |
| Destruction of habitats at the coast or in the sea e.g. losing mangrove communities |  |  |  |  |  |
| Coastal erosion |  |  |  |  |  |
| Changes in the distribution of marine wildlife (e.g. Increased in algae and jellyfish blooms) |  |  |  |  |  |

**Q14 Now please think about rising the sea-levels. What do you think the global average sea-level rise is likely to be, if at all, over the next 100 years?** Please select only one answer

|  | **Please select one answer** |
| --- | --- |
| Less than 10cm | **1** |
| 10cm to less than 1 metre rise | **2** |
| 1 metre to less than 10 metres rise | **3** |
| 10 metres or more | **4** |

**Q15 By how much do you think sea temperature around the coasts …..**

|  |  | **Please select one** |
| --- | --- | --- |
| 1. **has risen over the past 100 years?** Please select only one answer | There has been no sea temperature rise over the past 100 years | **1** |
| Less than 0.5 ºC | **2** |
| 0.5 ºC to less than 10ºC | **3** |
| 10ºC or more | **4** |

|  |  | **Please select one** |
| --- | --- | --- |
| 1. **will rise over the next 100 years?** Please select only one answer | There will be no sea temperature rise over the next 100 years |  |
| Less than 0.5 ºC | **1** |
| 0.5 ºC to less than 10ºC | **2** |
| 10ºC or more | **3** |

**(INFORMATION SOURCES) Q16: To what extent, if at all, do you trust each of the following types of media when providing information about coastal environmental issues?**

Please select only one answer for each information source

| **ROWS – Rotate statements – Keep ‘Other’ to the end** | 5.Trust a lot | 4. Trust a little | 3. Distrust a little | 2. Distrust a lot | 1.Don’t know |
| --- | --- | --- | --- | --- | --- |
| Magazines, Books, newspapers, Scientific publications |  |  |  |  |  |
| Internet (web pages), Social media (Twitter) |  |  |  |  |  |
| Friends, family, work colleagues |  |  |  |  |  |
| Radio, Television |  |  |  |  |  |
| Government reports |  |  |  |  |  |
| Reports by environmental organizations |  |  |  |  |  |

**(ENGAGEMENT QUESTION ) Q17: How effective are the following in tackling coastal environmental issues at the coastline or in the sea?** (Please select only one answer per statement)

| **(Rotate statements)** | 5. Very effective | 4. Somewhat effective | 3. Not very effective | 2. Not at all effective | 1. Don’t Know |
| --- | --- | --- | --- | --- | --- |
| Business and industry |  |  |  |  |  |
| international organisations like UN and IPCC |  |  |  |  |  |
| Community group, volunteers |  |  |  |  |  |
| government dissensions |  |  |  |  |  |
| community opinions |  |  |  |  |  |

**Q18 Please indicate whether you have taken any of the following actions to reduce and cope with the impacts of marine environmental issues** Please select only one answer per statement

| **Rotate statements – Keep ‘Other’ to the end** | **Yes** (1) | **No** (2) |
| --- | --- | --- |
| Choosing an environmentally friendly way of transportation |  |  |
| Reducing energy and water use at home |  |  |
| Buying locally sourced food |  |  |
| Buying environmentally friendly products |  |  |
| Using energy from sustainable sources (e.g. solar power) |  |  |
| Writing to political representatives about an environmental issue |  |  |
| Not using single use plastic |  |  |
| Using less quantities of wood while camping |  |  |
| Raising awareness by talking about it to family and friends or via social media |  |  |

**Q19 To what extent, if at all, do you trust each of the following individuals or organisations when providing information about coastal environmental issues?**

Please select only one answer for each information source

|  |  | 5.Trust a lot | 4. Trust a little | 3. Distrust a little | 2. Distrust a lot | 1.Don’t know |
| --- | --- | --- | --- | --- | --- | --- |
| 1 | Scientists working for government |  |  |  |  |  |
| 2 | Scientists working for environmental Non-Governmental Organisations |  |  |  |  |  |
| 3 | Scientists working for universities |  |  |  |  |  |
| 4 | Scientists working for industry |  |  |  |  |  |
| 5 | international organisations like UN and IPCC |  |  |  |  |  |
| 6 | Local authorities |  |  |  |  |  |
| 7 | Schools |  |  |  |  |  |

**(GOVERNMENT SPEND AND ACTIONS)**

**Q20 If you had to decide what marine policies should be prioritized by the Government, which three would you select from the list below?** Please select three responses

| **Rotate statements** | Please select three responses |
| --- | --- |
| Researching solutions to solve environmental impacts at the coast or in the sea |  |
| Impose fines on anyone how pollute the environment |  |
| Developing technologies to remove carbon dioxide from the atmosphere |  |
| Improving coastal defenses to help prevent coastal flooding and erosion |  |
| planting the coastlines to respond naturally to rising sea levels |  |
| Increasing the amount of energy from low carbon sources |  |
| Reducing the amount of fish that can be caught at sea to allow fish populations to recover |  |
| Establishment of natural reserves for the marine environment |  |
| Reducing greenhouse gas emissions from ships |  |
| Tightening controls over commercial activities allowed in the sea (e.g. oil rigs or sand extraction or sand filling). |  |
| Tightening controls over chemicals that can be released into the sea. |  |
| cut greenhouse gas emissions |  |
| Other (Please Specify) |  |

**Thank you for your time**
